# Supplementary material
Source: PubMed Central journal article supplement (PMC6363971)
Supplement: rccm.201807-1345OC_zhai_data_supplement.pdf [file rccm.201807-1345OC_zhai_data_supplement.pdf]

## **Club Cell Secretory Protein Deficiency Leads to Altered Lung Function**

Jing Zhai, Michael Insel, Kenneth J. Addison, Debra A. Stern, William Pederson, Alane Dy, Joselyn Rojas-Quintero, Caroline A. Owen, Duane L Sherrill, Wayne Morgan, Anne L Wright, Marilyn Halonen, Fernando Martinez, Monica Kraft, Stefano Guerra, and Julie G. Ledford

ONLINE DATA SUPPLEMENT

## List of Supplementary Materials

**Fig. E1.** Lung function by serum CC16 levels from age 11 to 32.

**Fig. E2.** Indices of acute inflammation are not present in CC16<sup>-/-</sup> naïve mice.

**Table E1.** Linear Regression Models for Lung Function\* as Measured from Age 22 to Age 32 years among Participants with No Asthma.

**Table E2.** Linear Regression Models for Lung Function\* as Measured from Age 22 to Age 32 years among Participants who did Not Smoke.

**Table E3.** Linear Regression Models for Lung Function\* as Measured from Age 22 to Age 32 years including total IgE levels among covariates.

**Table E4.** Linear Regression Models for Z-Scores of Lung Function\* as Measured from Age 11 to Age 32 years.

**Table E5.** Linear Regression with Clustering and Robust Standard Errors for Z-Scores of Lung Function\* as Measured from Age 11 to Age 32 years among Participants with No Asthma.

**Table E6.** Linear Regression Models for Z-Scores of Lung Function\* as Measured from Age 11 to Age 32 years among Participants who did Not Smoke.

**Table E7.** Multinomial Logistic Regression Models for Airway Hyper-responsiveness as Measured from Age 11 to Age 26 years including total IgE levels among covariates.

**Fig. E1.** Lung function by serum CC16 levels from age 11 to 32. FEV1, FVC, FEV<sub>25-75</sub>, and FEV1/FVC ratio **A**) before (N subject = 706) and **B**) after (N subject = 689) bronchodilator from age 11 to age 32 years by serum CC16 tertile categories. Data are shown separately for males and females. Error bars indicate the standard error.

**A**

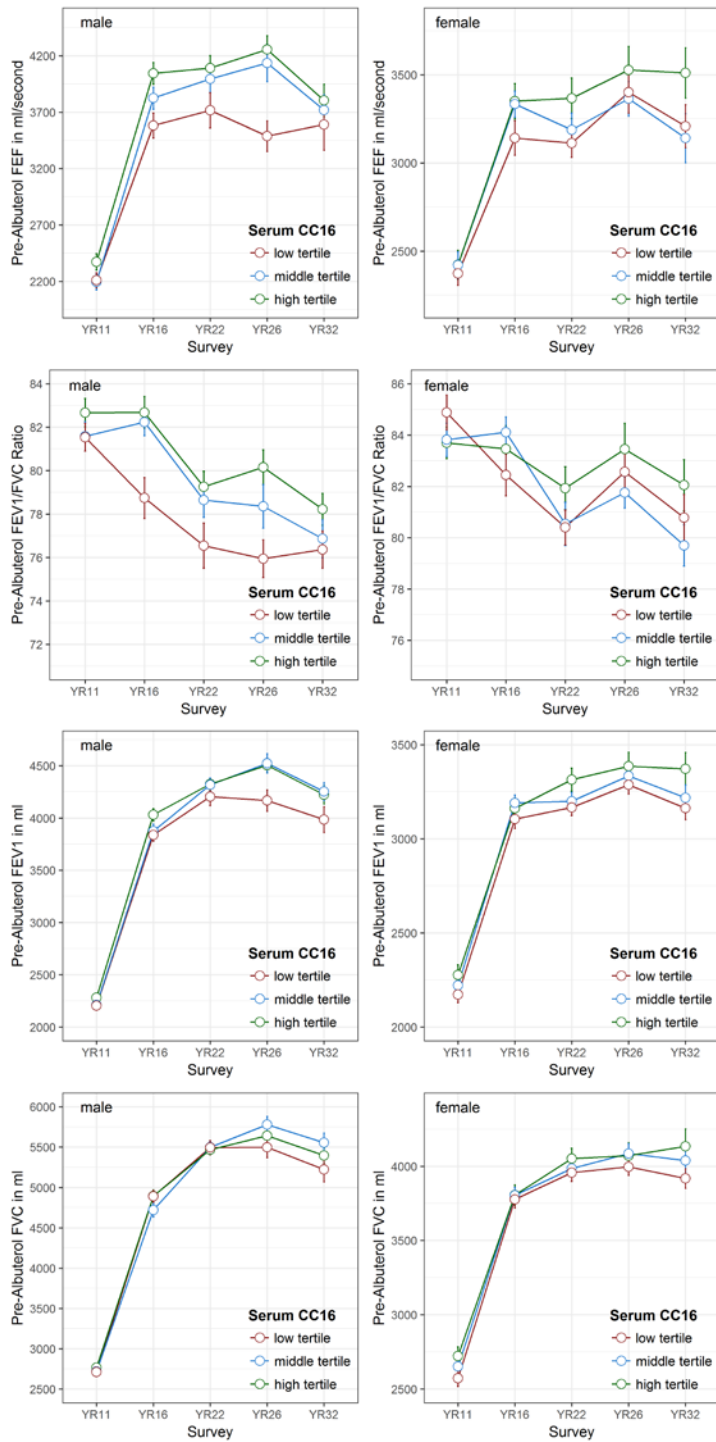

**B**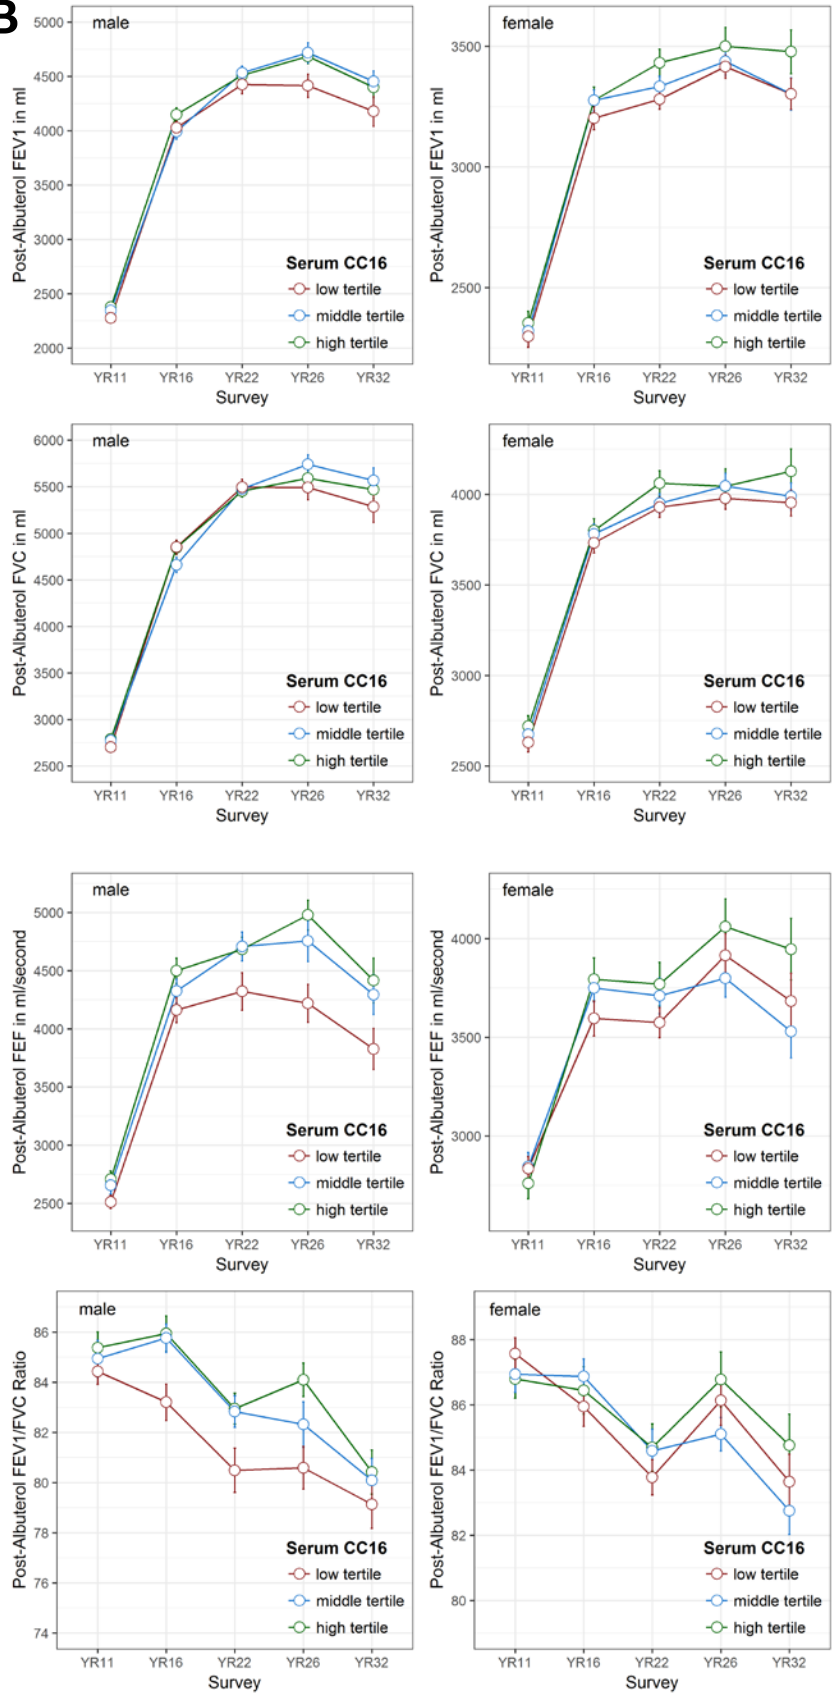

**Fig. E2. Indices of acute inflammation are not present in CC16<sup>-/-</sup> naïve mice.** After flexivent assessment, cells from the bronchoalveolar lavage were assessed in a subset of mice. There were no differences in **A)** total cells, **B)** macrophages and **C)** Neutrophils in WT (n=6) and CC16<sup>-/-</sup> (n=9) mice. **D)** TNF- $\alpha$  (n=6,6) and **E)** Muc5AC gene expression (n=6,6) and **F)** mucin production (n=12,12) as assessed by PAS score were not different in WT and CC16<sup>-/-</sup> mice. **G-H)** Airspace size was measured on formalin-fixed inflated lung sections. Representative pictures (10X) of alveolar areas of the lung from WT and CC16<sup>-/-</sup> naïve mice. The average alveolar chord length was ~20  $\mu$ m in both WT (n=9) and CC16<sup>-/-</sup> (n=6) mice at approximately 8-10 weeks of age.

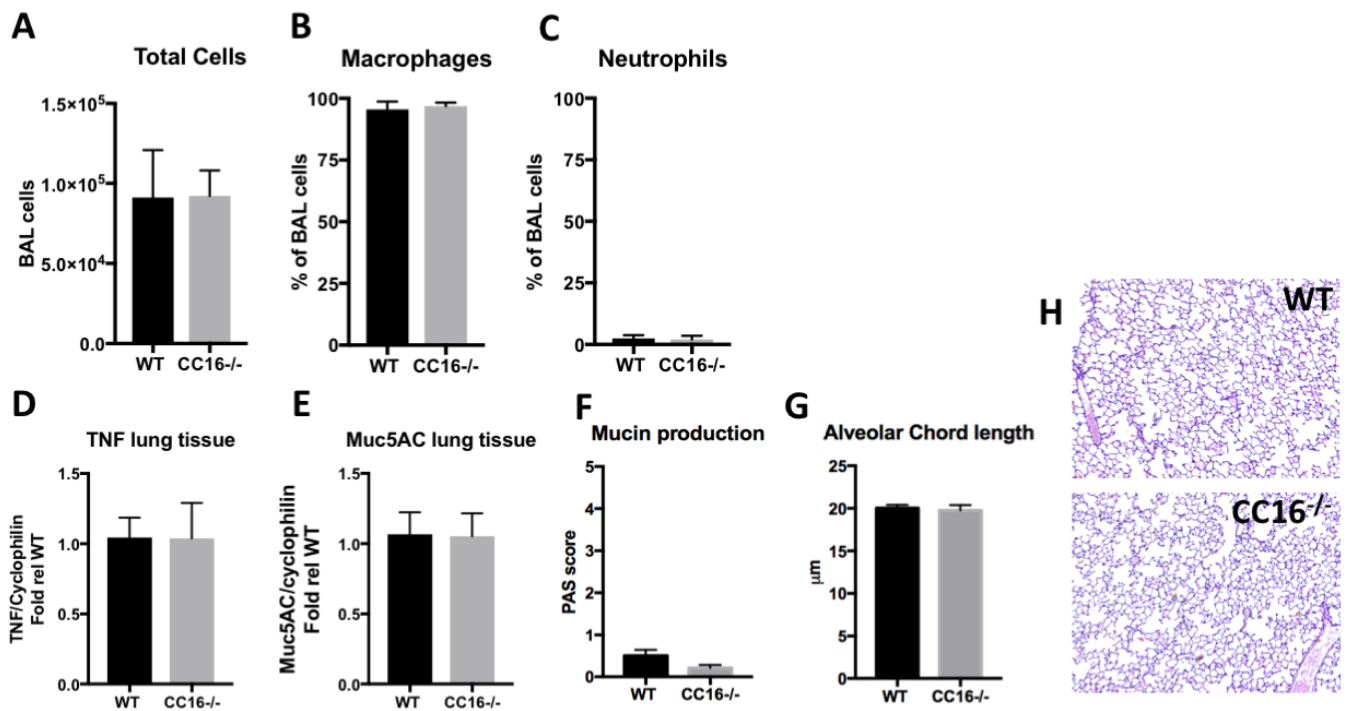

**Table E1.** Linear Regression Models for Lung Function\* as Measured from Age 22 to Age 32 years among Participants with No Asthma†.

| Pre-Albuterol     |        |                                                     |       |                                                    |       |                                                           |       |                                                          |       |
|-------------------|--------|-----------------------------------------------------|-------|----------------------------------------------------|-------|-----------------------------------------------------------|-------|----------------------------------------------------------|-------|
| Z-Scores CC16 †   |        | FEV1 (ml)<br>N subjects = 427; N observations = 755 |       | FVC (ml)<br>N subjects = 427; N observations = 755 |       | FEF (ml/second)<br>N subjects = 427; N observations = 755 |       | FEV1/FVC Ratio<br>N subjects = 427; N observations = 755 |       |
|                   |        | Coef (95% CI)                                       | P     | Coef (95% CI)                                      | P     | Coef (95% CI)                                             | P     | Coef (95% CI)                                            | P     |
| <b>Continuous</b> |        | 65.3 (26.6, 104)                                    | 0.001 | 26.3 (-24.0, 76.6)                                 | 0.304 | 122 (43.6, 201)                                           | 0.002 | 0.802 (0.263, 1.34)                                      | 0.004 |
| <b>Category</b>   | High   | (reference group)                                   |       |                                                    |       |                                                           |       |                                                          |       |
|                   | Middle | -44.9 (-130, 40.1)                                  | 0.300 | 33.5 (-59.9, 127)                                  | 0.481 | -179 (-352, -6.22)                                        | 0.042 | -1.50 (-2.62, -0.376)                                    | 0.009 |
|                   | Low    | -142 (-237, -47.7)                                  | 0.003 | -47.4 (-160, 65.6)                                 | 0.410 | -293 (-483, -103)                                         | 0.003 | -1.97 (-3.24, -0.703)                                    | 0.002 |
| Post-Albuterol    |        |                                                     |       |                                                    |       |                                                           |       |                                                          |       |
| Z-Scores CC16 †   |        | FEV1 (ml)<br>N subjects = 412; N observations = 711 |       | FVC (ml)<br>N subjects = 412; N observations = 711 |       | FEF (ml/second)<br>N subjects = 411; N observations = 705 |       | FEV1/FVC Ratio<br>N subjects = 412; N observations = 711 |       |
|                   |        | Coef (95% CI)                                       | P     | Coef (95% CI)                                      | P     | Coef (95% CI)                                             | P     | Coef (95% CI)                                            | P     |
| <b>Continuous</b> |        | 55.7 (16.1, 95.3)                                   | 0.006 | 25.6 (-26.7, 77.8)                                 | 0.337 | 131 (52.9, 209)                                           | 0.001 | 0.608 (0.132, 1.08)                                      | 0.012 |
| <b>Category</b>   | High   | (reference group)                                   |       |                                                    |       |                                                           |       |                                                          |       |
|                   | Middle | -38.1 (-121, 45.1)                                  | 0.368 | 12.4 (-83.8, 109)                                  | 0.800 | -209 (-392, -27.1)                                        | 0.024 | -1.03 (-2.02, -0.039)                                    | 0.042 |
|                   | Low    | -122 (-216, -26.9)                                  | 0.012 | -40.3 (-157, 76.3)                                 | 0.497 | -348 (-547, -149)                                         | 0.001 | -1.66 (-2.79, -0.520)                                    | 0.004 |

\* Lung function was assessed pre- and post-albuterol.

† Circulating CC16 levels were included as z-scores in the model.

‡ Subject-clustered sandwich estimators of standard errors were used in linear regression models to adjust for within-subject correlation. All models were adjusted for sex, survey year, ethnicity, parental education, maternal smoking at year 6, and height (cm). The models are restricted to the non-asthmatics participants.

**Table E2.** Linear Regression Models for Lung Function\* as Measured from Age 22 to Age 32 years among Participants who did Not Smoke†.

| Z-Scores CC16 †   |        | Pre-Albuterol                                       |       |                                                    |       |                                                           |        |                                                          |       |
|-------------------|--------|-----------------------------------------------------|-------|----------------------------------------------------|-------|-----------------------------------------------------------|--------|----------------------------------------------------------|-------|
|                   |        | FEV1 (ml)<br>N subjects = 265; N observations = 499 |       | FVC (ml)<br>N subjects = 265; N observations = 499 |       | FEF (ml/second)<br>N subjects = 265; N observations = 499 |        | FEV1/FVC Ratio<br>N subjects = 265; N observations = 499 |       |
|                   |        | Coef (95% CI)                                       | P     | Coef (95% CI)                                      | P     | Coef (95% CI)                                             | P      | Coef (95% CI)                                            | P     |
| <b>Continuous</b> |        | 70.9 (22.3, 119)                                    | 0.004 | 11.7 (-46.8, 70.1)                                 | 0.694 | 183 (81.3, 284)                                           | <0.001 | 1.18 (0.444, 1.92)                                       | 0.002 |
| <b>Category</b>   | High   | (reference group)                                   |       |                                                    |       |                                                           |        |                                                          |       |
|                   | Middle | -72.5 (-172, 26.8)                                  | 0.152 | 13.4 (-101, 128)                                   | 0.818 | -260 (-469, -50.8)                                        | 0.015  | -1.77 (-3.19, -0.343)                                    | 0.015 |
|                   | Low    | -179 (-296, -62.1)                                  | 0.003 | -54.4 (-195, 85.7)                                 | 0.445 | -426 (-669, -183)                                         | 0.001  | -2.67 (-4.34, -1.00)                                     | 0.002 |
| Z-Scores CC16 †   |        | Post-Albuterol                                      |       |                                                    |       |                                                           |        |                                                          |       |
|                   |        | FEV1 (ml)<br>N subjects = 260; N observations = 479 |       | FVC (ml)<br>N subjects = 260; N observations = 479 |       | FEF (ml/second)<br>N subjects = 260; N observations = 476 |        | FEV1/FVC Ratio<br>N subjects = 260; N observations = 479 |       |
|                   |        | Coef (95% CI)                                       | P     | Coef (95% CI)                                      | P     | Coef (95% CI)                                             | P      | Coef (95% CI)                                            | P     |
| <b>Continuous</b> |        | 56.3 (7.42, 105)                                    | 0.024 | 18.6 (-40.1, 77.3)                                 | 0.533 | 155 (45.4, 264)                                           | 0.006  | 0.779 (0.090, 1.47)                                      | 0.027 |
| <b>Category</b>   | High   | (reference group)                                   |       |                                                    |       |                                                           |        |                                                          |       |
|                   | Middle | -35.5 (-134, 62.6)                                  | 0.477 | -5.83 (-124, 113)                                  | 0.923 | -191 (-414, 32.1)                                         | 0.093  | -0.807 (-2.05, 0.440)                                    | 0.204 |
|                   | Low    | -139 (-255, -22.6)                                  | 0.019 | -54.7 (-197, 87.9)                                 | 0.451 | -386 (-645, -126)                                         | 0.004  | -1.87 (-3.41, -0.332)                                    | 0.017 |

\* Lung function was assessed pre- and post-albuterol.

† Circulating CC16 levels were included as z-scores in the model.

‡ Subject-clustered sandwich estimators of standard errors were used in linear regression models to adjust for within-subject correlation. All models were adjusted for sex, survey year, ethnicity, parental education, maternal smoking at year 6, and height (cm). All models were restricted to never-smokers, i.e. participants who never smoked or who smoked less than 100 cigarettes in their lifetime.

**Table E3.** Linear Regression Models for Lung Function\* as Measured from Age 22 to Age 32 years including total IgE levels among covariates‡.

| Pre-Albuterol     |        |                                        |       |                                        |       |                                        |       |                                        |       |
|-------------------|--------|----------------------------------------|-------|----------------------------------------|-------|----------------------------------------|-------|----------------------------------------|-------|
| Z-Scores CC16 †   |        | FEV1 (ml)                              |       | FVC (ml)                               |       | FEF (ml/second)                        |       | FEV1/FVC Ratio                         |       |
|                   |        | N subjects = 491; N observations = 906 |       | N subjects = 491; N observations = 906 |       | N subjects = 491; N observations = 906 |       | N subjects = 491; N observations = 906 |       |
|                   |        | Coef (95% CI)                          | P     |
| <b>Continuous</b> |        | 49.6 (14.1, 85.0)                      | 0.006 | 12.1 (-31.8, 56.0)                     | 0.588 | 113 ( 37.3, 189)                       | 0.004 | 0.747 (0.214, 1.28)                    | 0.006 |
| <b>Category</b>   | High   | (reference group)                      |       |                                        |       |                                        |       |                                        |       |
|                   | Middle | -16.9 (-92.6, 58.9)                    | 0.662 | 61.8 (-20.3, 144)                      | 0.140 | -138 (-299, 23.0)                      | 0.093 | -1.36 (-2.46, -0.257)                  | 0.016 |
|                   | Low    | -114 (-199, -29.2)                     | 0.009 | -22.4 ( -122, 77.0)                    | 0.658 | -273 (-447,-99.9)                      | 0.002 | -1.85 (-3.07, -0.632)                  | 0.003 |
| Post-Albuterol    |        |                                        |       |                                        |       |                                        |       |                                        |       |
| Z-Scores CC16 †   |        | FEV1 (ml)                              |       | FVC (ml)                               |       | FEF (ml/second)                        |       | FEV1/FVC Ratio                         |       |
|                   |        | N subjects = 474; N observations = 855 |       | N subjects = 474; N observations = 855 |       | N subjects = 473; N observations = 849 |       | N subjects = 474; N observations = 855 |       |
|                   |        | Coef (95% CI)                          | P     |
| <b>Continuous</b> |        | 35.8 (0.301, 71.3)                     | 0.048 | 9.54 (-35.7, 54.8)                     | 0.679 | 105 (29.3, 181)                        | 0.007 | 0.526 (0.068, 0.984)                   | 0.025 |
| <b>Category</b>   | High   | (reference group)                      |       |                                        |       |                                        |       |                                        |       |
|                   | Middle | 5.18 (-68.6, 78.9)                     | 0.890 | 45.6 (-40.4, 132)                      | 0.298 | -111 (-279, 57.8)                      | 0.197 | -0.750 (-1.71, 0.209)                  | 0.125 |
|                   | Low    | -82.3 (-167, 2.28)                     | 0.056 | -13.1 (-115, 89.0)                     | 0.801 | -284 (-465, -104)                      | 0.002 | -1.42 (-2.50, -0.341)                  | 0.010 |

\* Lung function was assessed pre- and post-albuterol.

† Circulating CC16 levels were included as z-scores in the model.

‡ Subject-clustered sandwich estimators of standard errors were used in linear regression models to adjust for within-subject correlation. All models were adjusted for sex, survey year, ethnicity, parental education, maternal smoking at year 6, height (cm) and log10 transformed IgE (IU/ml).



**Table E4.** Linear Regression Models for Z-Scores of Lung Function\* as Measured from Age 11 to Age 32 years‡.

| Pre-Albuterol     |        |                                         |        |                                         |       |                                         |        |                                         |       |
|-------------------|--------|-----------------------------------------|--------|-----------------------------------------|-------|-----------------------------------------|--------|-----------------------------------------|-------|
| Z-Scores CC16 †   |        | Z-Scores FEV1                           |        | Z-Scores FVC                            |       | Z-Scores FEF                            |        | Z-Scores FEV1/FVC Ratio                 |       |
|                   |        | N subjects = 674; N observations = 1872 |        | N subjects = 674; N observations = 1872 |       | N subjects = 674; N observations = 1868 |        | N subjects = 674; N observations = 1872 |       |
|                   |        | Coef (95% CI)                           | P      | Coef (95% CI)                           | P     | Coef (95% CI)                           | P      | Coef (95% CI)                           | P     |
| <b>Continuous</b> |        | 0.081 (0.045, 0.117)                    | <0.001 | 0.031 (-0.004, 0.065)                   | 0.079 | 0.115 (0.058, 0.173)                    | <0.001 | 0.099 (0.037, 0.162)                    | 0.002 |
| <b>Category</b>   | High   | (reference group)                       |        |                                         |       |                                         |        |                                         |       |
|                   | Middle | -0.057 (-0.143, 0.030)                  | 0.198  | 0.0009 (-0.078, 0.080)                  | 0.983 | -0.138 (-0.259, -0.018)                 | 0.025  | -0.141 (-0.268, -0.014)                 | 0.029 |
|                   | Low    | -0.173 (-0.265, -0.082)                 | <0.001 | -0.054 (-0.142, 0.033)                  | 0.224 | -0.275 (-0.410, -0.139)                 | <0.001 | -0.243 (-0.390, -0.097)                 | 0.001 |
| Post-Albuterol    |        |                                         |        |                                         |       |                                         |        |                                         |       |
| Z-Scores CC16 †   |        | Z-Scores FEV1                           |        | Z-Scores FVC                            |       | Z-Scores FEF                            |        | Z-Scores FEV1/FVC Ratio                 |       |
|                   |        | N subjects = 659; N observations = 1807 |        | N subjects = 659; N observations = 1806 |       | N subjects = 659; N observations = 1799 |        | N subjects = 659; N observations = 1806 |       |
|                   |        | Coef (95% CI)                           | P      | Coef (95% CI)                           | P     | Coef (95% CI)                           | P      | Coef (95% CI)                           | P     |
| <b>Continuous</b> |        | 0.063 (0.027, 0.098)                    | 0.001  | 0.029 (-0.007, 0.065)                   | 0.110 | 0.094 (0.039, 0.149)                    | 0.001  | 0.081 (0.021, 0.141)                    | 0.008 |
| <b>Category</b>   | High   | (reference group)                       |        |                                         |       |                                         |        |                                         |       |
|                   | Middle | -0.032 (-0.115, 0.051)                  | 0.446  | -0.006 (-0.087, 0.075)                  | 0.890 | -0.076 (-0.194, 0.043)                  | 0.212  | -0.082 (-0.210, 0.046)                  | 0.211 |
|                   | Low    | -0.137 (-0.223, -0.051)                 | 0.002  | -0.056 (-0.145, 0.032)                  | 0.210 | -0.240 (-0.370, -0.109)                 | <0.001 | -0.207 (-0.352, -0.063)                 | 0.005 |

\* Lung function was assessed pre- and post-albuterol.

† Circulating CC16 levels were included as z-scores in the model.

‡ Subject-clustered sandwich estimators of standard errors were used in linear regression models to adjust for within-subject correlation. All models were adjusted for sex, survey year, ethnicity, parental education, maternal smoking at year 6, and height (cm).

**Table E5.** Linear Regression Models for Z-Scores of Lung Function\* as Measured from Age 11 to Age 32 years among Participants with No Asthma†.

| Pre-Albuterol     |        |                                                          |        |                                                         |       |                                                         |       |                                                                    |       |
|-------------------|--------|----------------------------------------------------------|--------|---------------------------------------------------------|-------|---------------------------------------------------------|-------|--------------------------------------------------------------------|-------|
| Z-Scores CC16 †   |        | Z-Scores FEV1<br>N subjects = 593; N observations = 1492 |        | Z-Scores FVC<br>N subjects = 593; N observations = 1492 |       | Z-Scores FEF<br>N subjects = 593; N observations = 1488 |       | Z-Scores FEV1/FVC Ratio<br>N subjects = 593; N observations = 1492 |       |
|                   |        | Coef (95% CI)                                            | P      | Coef (95% CI)                                           | P     | Coef (95% CI)                                           | P     | Coef (95% CI)                                                      | P     |
| <b>Continuous</b> |        | 0.087 (0.045, 0.128)                                     | <0.001 | 0.039 (-0.0007, 0.078)                                  | 0.054 | 0.106 (0.044, 0.167)                                    | 0.001 | 0.088 (0.024, 0.152)                                               | 0.007 |
| <b>Category</b>   | High   | (reference group)                                        |        |                                                         |       |                                                         |       |                                                                    |       |
|                   | Middle | -0.065 (-0.160, 0.030)                                   | 0.178  | -0.003 (-0.091, 0.086)                                  | 0.955 | -0.143 (-0.272, -0.015)                                 | 0.029 | -0.148 (-0.280, -0.017)                                            | 0.027 |
|                   | Low    | -0.177 (-0.277, -0.077)                                  | 0.001  | -0.068 (-0.165, 0.029)                                  | 0.169 | -0.247 (-0.388, -0.107)                                 | 0.001 | -0.211 (-0.358, -0.064)                                            | 0.005 |
| Post-Albuterol    |        |                                                          |        |                                                         |       |                                                         |       |                                                                    |       |
| Z-Scores CC16 †   |        | Z-Scores FEV1<br>N subjects = 576; N observations = 1436 |        | Z-Scores FVC<br>N subjects = 576; N observations = 1436 |       | Z-Scores FEF<br>N subjects = 576; N observations = 1428 |       | Z-Scores FEV1/FVC Ratio<br>N subjects = 576; N observations = 1436 |       |
|                   |        | Coef (95% CI)                                            | P      | Coef (95% CI)                                           | P     | Coef (95% CI)                                           | P     | Coef (95% CI)                                                      | P     |
| <b>Continuous</b> |        | 0.077 (0.037, 0.116)                                     | <0.001 | 0.039 (-0.001, 0.079)                                   | 0.057 | 0.098 (0.041, 0.156)                                    | 0.001 | 0.082 (0.020, 0.145)                                               | 0.010 |
| <b>Category</b>   | High   | (reference group)                                        |        |                                                         |       |                                                         |       |                                                                    |       |
|                   | Middle | -0.059 (-0.151, 0.032)                                   | 0.200  | -0.017 (-0.106, 0.073)                                  | 0.714 | -0.107 (-0.235, 0.021)                                  | 0.102 | -0.115 (-0.252, 0.021)                                             | 0.096 |
|                   | Low    | -0.155 (-0.251, -0.060)                                  | 0.001  | -0.069 (-0.167, 0.029)                                  | 0.168 | -0.240 (-0.375, -0.104)                                 | 0.001 | -0.205 (-0.353, -0.058)                                            | 0.006 |

\* Lung function was assessed pre- and post-albuterol.

† Circulating CC16 levels were included as z-scores in the model.

‡ Subject-clustered sandwich estimators of standard errors were used in linear regression models to adjust for within-subject correlation. All models were adjusted for sex, survey year, ethnicity, parental education, maternal smoking at year 6, and height (cm). All models were restricted to participants with no asthma.

**Table E6.** Linear Regression Models for Z-Scores of Lung Function\* as Measured from Age 11 to Age 32 years among Participants who did Not Smoke‡.

| Pre-Albuterol     |        |                                         |        |                                         |       |                                         |        |                                         |       |
|-------------------|--------|-----------------------------------------|--------|-----------------------------------------|-------|-----------------------------------------|--------|-----------------------------------------|-------|
| Z-Scores CC16 †   |        | Z-Scores FEV1                           |        | Z-Scores FVC                            |       | Z-Scores FEF                            |        | Z-Scores FEV1/FVC Ratio                 |       |
|                   |        | N subjects = 572; N observations = 1255 |        | N subjects = 572; N observations = 1255 |       | N subjects = 572; N observations = 1252 |        | N subjects = 572; N observations = 1255 |       |
|                   |        | Coef (95% CI)                           | P      | Coef (95% CI)                           | P     | Coef (95% CI)                           | P      | Coef (95% CI)                           | P     |
| <b>Continuous</b> |        | 0.083 (0.042, 0.125)                    | <0.001 | 0.023 (-0.019, 0.065)                   | 0.279 | 0.136 (0.074, 0.199)                    | <0.001 | 0.122 (0.052, 0.192)                    | 0.001 |
| Category          | High   | (reference group)                       |        |                                         |       |                                         |        |                                         |       |
|                   | Middle | -0.072 (-0.169, 0.024)                  | 0.142  | -0.016 (-0.113, 0.080)                  | 0.741 | -0.163 (-0.293, -0.034)                 | 0.013  | -0.137 (-0.275, 0.0004)                 | 0.051 |
|                   | Low    | -0.200 (-0.304, -0.095)                 | <0.001 | -0.061 (-0.168, 0.046)                  | 0.263 | -0.328 (-0.485, -0.171)                 | <0.001 | -0.290 (-0.461, -0.120)                 | 0.001 |
| Post-Albuterol    |        |                                         |        |                                         |       |                                         |        |                                         |       |
| Z-Scores CC16 †   |        | Z-Scores FEV1                           |        | Z-Scores FVC                            |       | Z-Scores FEF                            |        | Z-Scores FEV1/FVC Ratio                 |       |
|                   |        | N subjects = 568; N observations = 1232 |        | N subjects = 568; N observations = 1231 |       | N subjects = 568; N observations = 1227 |        | N subjects = 568; N observations = 1231 |       |
|                   |        | Coef (95% CI)                           | P      | Coef (95% CI)                           | P     | Coef (95% CI)                           | P      | Coef (95% CI)                           | P     |
| <b>Continuous</b> |        | 0.060 (0.017, 0.103)                    | 0.006  | 0.023 (-0.021, 0.066)                   | 0.306 | 0.099 (0.038, 0.160)                    | 0.002  | 0.093 (0.024, 0.162)                    | 0.009 |
| Category          | High   | (reference group)                       |        |                                         |       |                                         |        |                                         |       |
|                   | Middle | -0.042 (-0.138, 0.054)                  | 0.389  | -0.027 (-0.124, 0.071)                  | 0.595 | -0.069 (-.198, 0.060)                   | 0.295  | -0.054 (-0.191, 0.084)                  | 0.442 |
|                   | Low    | -0.154 (-0.255, -0.053)                 | 0.003  | -0.063 (-0.170, 0.044)                  | 0.250 | -0.259 (-0.407, -0.112)                 | 0.001  | -0.236 (-0.404, -0.069)                 | 0.006 |

\* Lung function was assessed pre- and post-albuterol.

† Circulating CC16 levels were included as z-scores in the model.

‡ Subject-clustered sandwich estimators of standard errors were used in linear regression models to adjust for within-subject correlation. All models were adjusted for sex, survey year, ethnicity, parental education, maternal smoking at year 6, and height (cm). All models were restricted to never-smokers, i.e. participants who never smoked or who smoked less than 100 cigarettes in their lifetime.

**Table E7.** Multinomial Logistic Regression Models for Airway Hyper-responsiveness as Measured from Age 11 to Age 26 years including total IgE levels among covariates†.

| Airway Hyper-Responsiveness |                              |        | All participant (N subjects = 552; N observations = 1198) |        | No asthma (N subjects = 490; N observations = 1007) |        | Non-smoker (N subjects = 483; N observations = 875) |        |
|-----------------------------|------------------------------|--------|-----------------------------------------------------------|--------|-----------------------------------------------------|--------|-----------------------------------------------------|--------|
|                             |                              |        | adjRRR (95% CI)                                           | P      | adjRRR (95% CI)                                     | P      | adjRRR (95% CI)                                     | P      |
| <b>No drop</b>              | (base outcome)               |        |                                                           |        |                                                     |        |                                                     |        |
| <b>Mild</b>                 | z-score CC16 *<br>continuous |        | 0.943 (0.790, 1.13)                                       | 0.515  | 0.918 (0.753, 1.12)                                 | 0.395  | 0.890 (0.714, 1.11)                                 | 0.300  |
| <b>Moderate</b>             |                              |        | 0.761 (0.636, 0.910)                                      | 0.003  | 0.768 (0.627, 0.941)                                | 0.011  | 0.652 (0.515, 0.826)                                | <0.001 |
| <b>Severe</b>               |                              |        | 0.678 (0.554, 0.831)                                      | <0.001 | 0.637 (0.499, 0.813)                                | <0.001 | 0.601 (0.470, 0.768)                                | <0.001 |
| <b>No drop</b>              | (base outcome)               |        |                                                           |        |                                                     |        |                                                     |        |
| <b>Mild</b>                 | z-score CC16*<br>category    | High   | (reference group)                                         |        |                                                     |        |                                                     |        |
|                             |                              | Middle | 1.22 (0.831, 1.80)                                        | 0.308  | 1.28 (0.851, 1.92)                                  | 0.238  | 1.43 (0.925, 2.22)                                  | 0.107  |
|                             |                              | Low    | 1.18 (0.760, 1.85)                                        | 0.456  | 1.20 (0.750, 1.90)                                  | 0.453  | 1.39 (0.821, 2.36)                                  | 0.219  |
| <b>Moderate</b>             |                              | High   | (reference group)                                         |        |                                                     |        |                                                     |        |
|                             |                              | Middle | 1.26 (0.839, 1.90)                                        | 0.264  | 1.28 (0.814, 2.01)                                  | 0.287  | 1.47 (0.898, 2.42)                                  | 0.125  |
|                             |                              | Low    | 1.84 (1.19, 2.84)                                         | 0.006  | 1.86 (1.16, 2.98)                                   | 0.010  | 2.52 (1.50, 4.25)                                   | 0.001  |
| <b>Severe</b>               |                              | High   | (reference group)                                         |        |                                                     |        |                                                     |        |
|                             |                              | Middle | 1.40 (0.905, 2.16)                                        | 0.131  | 1.75 (1.06, 2.89)                                   | 0.029  | 1.44 (0.894, 2.31)                                  | 0.135  |
|                             |                              | Low    | 2.16 (1.34, 3.47)                                         | 0.001  | 2.51 (1.43, 4.40)                                   | 0.001  | 2.83 (1.63, 4.89)                                   | <0.001 |

\* Circulating CC16 levels were included as z-scores in the model.

† Subject-clustered sandwich estimators of standard errors were used in multinomial logistic regression models to adjust for within-subject correlation. All models were adjusted for sex, survey year, ethnicity, parental education, maternal smoking at year 6 and log10 transformed IgE (IU/ml).

AHR severity (mild, moderate, severe) was defined based on PD20 tertiles generated at each survey (see Methods section for more information)
